# Supplementary material for: Preparation and property of ZrO2/GO multi-layered nanocomposite lubricating film
Source: Royal Society of Chemistry journal article supplement (doi:10.1039/c4ra06085g), 2014-08-06
Supplement: c4ra06085g1.pdf [file c4ra06085g1.pdf]

**Supplementary Information**

**Preparation and property of ZrO<sub>2</sub>/GO multi-layered  
nanocomposite lubricating film**

Yongjuan Mi,<sup>ab</sup> Jinqing Wang,<sup>\*a</sup> Zhigang Yang,<sup>a</sup> Honggang Wang,<sup>a</sup>

Zhaofeng Wang,<sup>\*a</sup> and Shengrong Yang<sup>a</sup>

<sup>a</sup> State Key Laboratory of Solid Lubrication, Lanzhou Institute of Chemical Physics,  
Chinese Academy of Sciences, Lanzhou, 730000, P. R. China.

<sup>b</sup> University of Chinese Academy of Sciences, Beijing, 100080, P. R. China

E-mail: jqwang@licp.cas.cn, zhfwang@licp.cas.cn;

Fax: +86-931-8277088; Tel: +86-931-4968076

**Surface preparation of substrates and the construction of SAMs**

N-Type single-crystal silicon (100) wafers, polished on one side, were used as substrates. The silicon wafers were immersed in Piranha solution (a mixture of 98% H<sub>2</sub>SO<sub>4</sub> and 30% H<sub>2</sub>O<sub>2</sub> with a volume ratio of 7:3) at 90 °C for 30 min. Then they were thoroughly rinsed with ultrapure water and dried in N<sub>2</sub> flow. This freshly treated silicon wafers were used for the following deposition of APTS-PDA self-assembled monolayers (SAMs).

In order to increase the bonding strength of GO with the silicon substrate and endow such ZrO<sub>2</sub>/GO nanocomposite film wide substrate applicability, the pretreated silicon substrates were first modified with APTS and PDA SAMs,

respectively, by subsequently putting into a 5 mM APTS solution in a mixture of acetone and water (the volume ratio of acetone and water was 5:1) for 30 min, and then a dopamine solution in Tris-HCl (pH = 8.5) for 6 h. Between immersions, samples were thoroughly rinsed in ultrapure water and dried completely with N<sub>2</sub> flow.

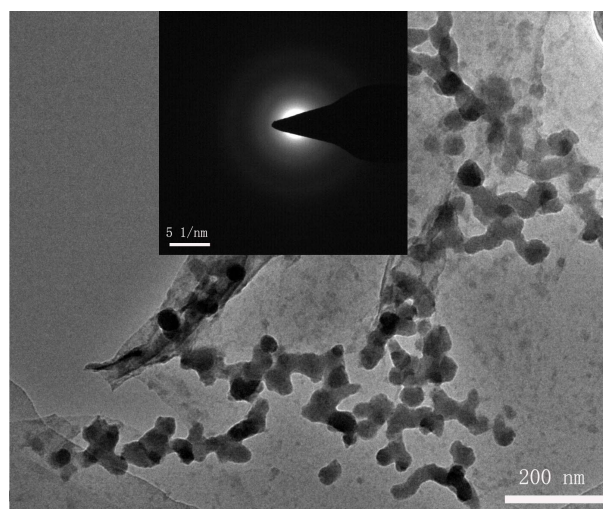

Figure S1. FE-TEM image of simulation reaction in solution of the proposed method for the preparation of ZrO<sub>2</sub>/GO composite thin film after being kept at 50 °C for 30 min and the corresponding SAED patterns is shown as inset.

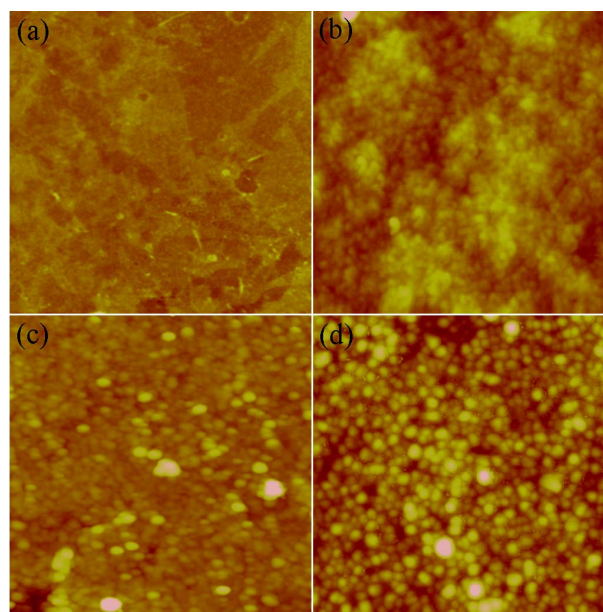

Figure S2. AFM images of the 500 °C annealed ZrO<sub>2</sub>/GO nanocomposite film with the scanning area and the data scale of 5×5 μm<sup>2</sup>, 50 nm (a) and 1×1 μm<sup>2</sup>, 20 nm (b), respectively; AFM images of 900 °C annealed ZrO<sub>2</sub>/GO nanocomposite film with the scanning area and the data scale of 5×5 μm<sup>2</sup>, 50 nm (c) and 1×1 μm<sup>2</sup>, 20 nm (d), respectively.

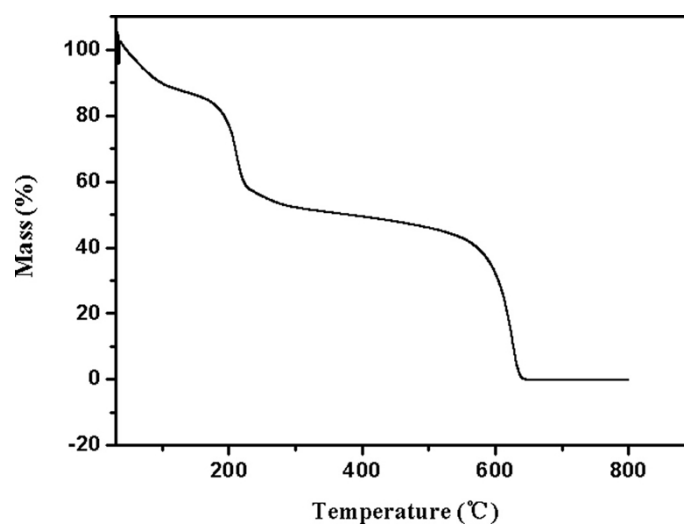

Figure S3. TG curve of GO powder at a heating rate of 10 °C/min in air.

Table S1. Hardness and reduced modulus ( $E_r$ ) of homogenous  $ZrO_2$  thin film at an indentation depth of 30 nm.

| Sample          | Hardness (GPa)   | $E_r$ (GPa)       |
|-----------------|------------------|-------------------|
| As-deposited    | $1.49 \pm 0.12$  | $19.08 \pm 2.76$  |
| 500 °C annealed | $15.88 \pm 0.40$ | $186.83 \pm 3.63$ |
| 900 °C annealed | $16.63 \pm 0.38$ | $168.79 \pm 4.6$  |

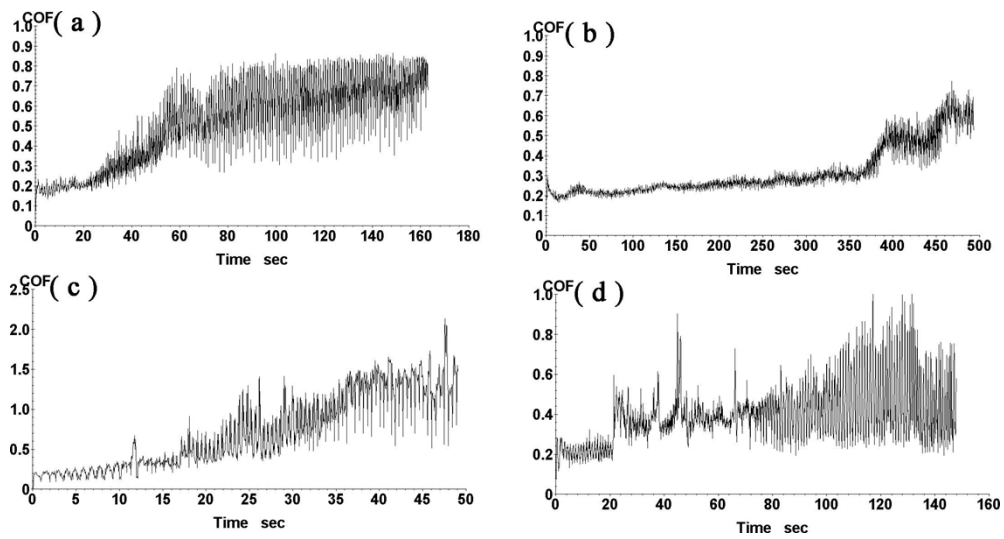

Figure S4. Variation in friction coefficient with time for 500 °C (a, c) and 900 °C (b, d) annealed homogeneous  $ZrO_2$  film under a fixed sliding frequency of 1 Hz and the applied loads of 0.1 N and 0.3 N, respectively.

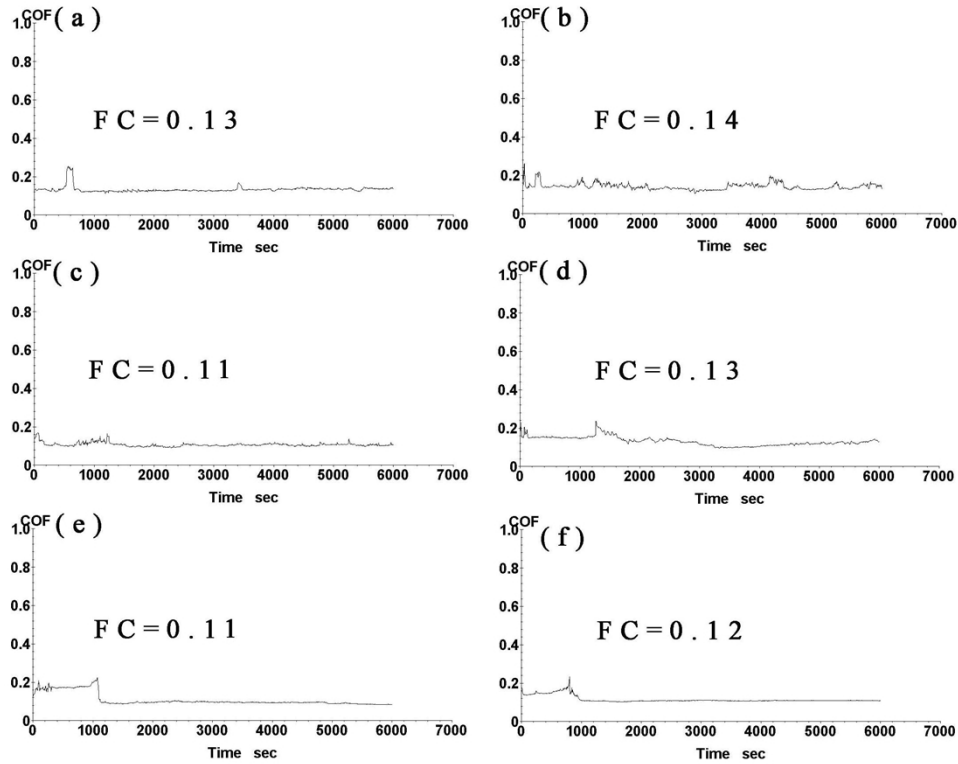

Figure S5. Variation in friction coefficient with time for 500 °C (a, c, e) and 900 °C (b, d, f) annealed  $ZrO_2/GO$  multi-layered nanocomposite film under a fixed sliding frequency of 1 Hz and the applied loads of 0.3 N, 0.5 N and 1.0 N, respectively. The average friction coefficient (FC) was given above the corresponding curve.

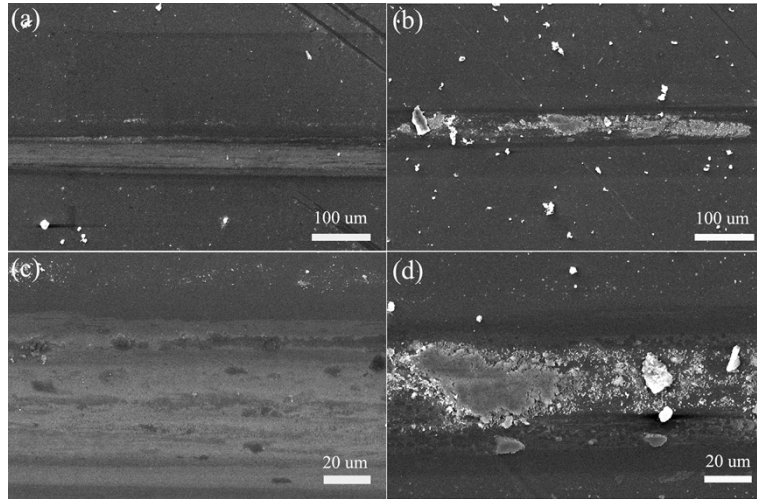

Figure S6 SEM micrographs of the worn surfaces for homogeneous  $ZrO_2$  thin films sliding against steel ball under the applied load of 0.1 N and a fixed sliding frequency of 1 Hz: (a) and (c) 500 °C annealed homogeneous  $ZrO_2$  thin film, (c) and (d) 900 °C annealed homogeneous  $ZrO_2$  thin film.

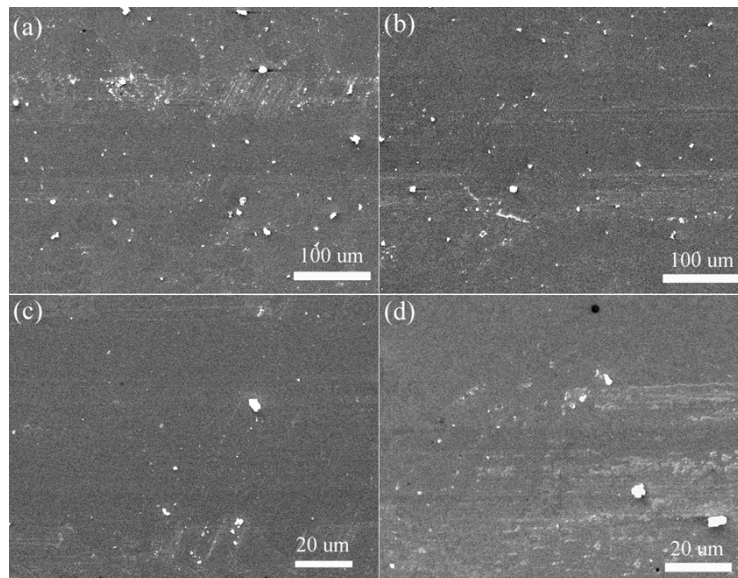

Fig. S7 SEM micrographs of the worn surfaces for  $ZrO_2/GO$  nanocomposite films sliding against steel ball under the applied load of 0.5 N and a fixed sliding frequency of 1 Hz: (a) and (c) 500 °C annealed  $ZrO_2/GO$  nanocomposite film, (b) and (d) 900 °C annealed  $ZrO_2/GO$  nanocomposite film.
